# Supplementary material for: Droplet-Based Microfluidic Preparation of Shape-Variable Alginate Hydrogel Magnetic Micromotors
Source: MDPI journal article supplement (doi:10.3390/nano12010115), 2021-12-30
Supplement: s1 [file s1]

# Droplet-Based Microfluidic Preparation of Shape-Variable Alginate Hydrogel Magnetic Micromotors

Cheng Zhang, Yong Wang, Yuduo Chen, Xing Ma \* and Wenjun Chen \*

Sauvage Laboratory for Smart Materials, School of Materials Science and Engineering, Harbin Institute of Technology (Shenzhen), Shenzhen 518055, China; youzishaxiao@gmail.com (C.Z.); 18b954090@stu.hit.edu.cn (Y.W.); chenyuduo@stu.hit.edu.cn (Y.C.)

\* Correspondence: maxing@hit.edu.cn (X.M.); chenwenjun@hit.edu.cn (W.C.)

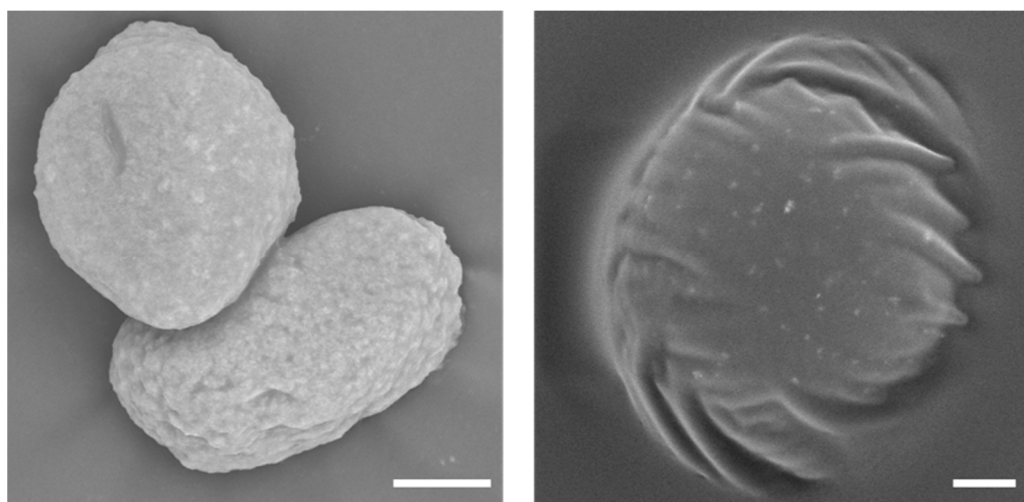

**Figure S1.** SEM images of Na-Alg/Fe<sub>3</sub>O<sub>4</sub> microparticles fabricated with the use of Tween 80 (surfactant) in DMC.  $C_{i,Na-Alg}$  is 0.09 mg/mL (left) and 0.9 mg/mL (right) for the microfluidic experiment. Scale bar 10 μm.

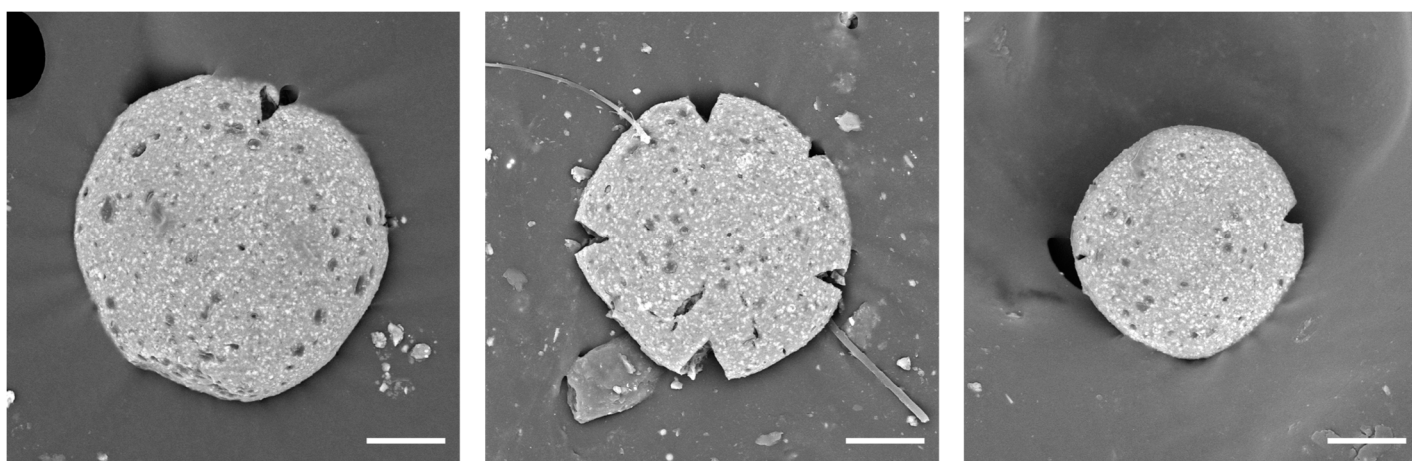

**Figure S2.** SEM images of broken Na-Alg/Fe<sub>3</sub>O<sub>4</sub> microparticles (prepared with  $C_{i,Na-Alg}$  at 0.9 mg/mL for the microfluidic experiment). Scale bar 20 μm.

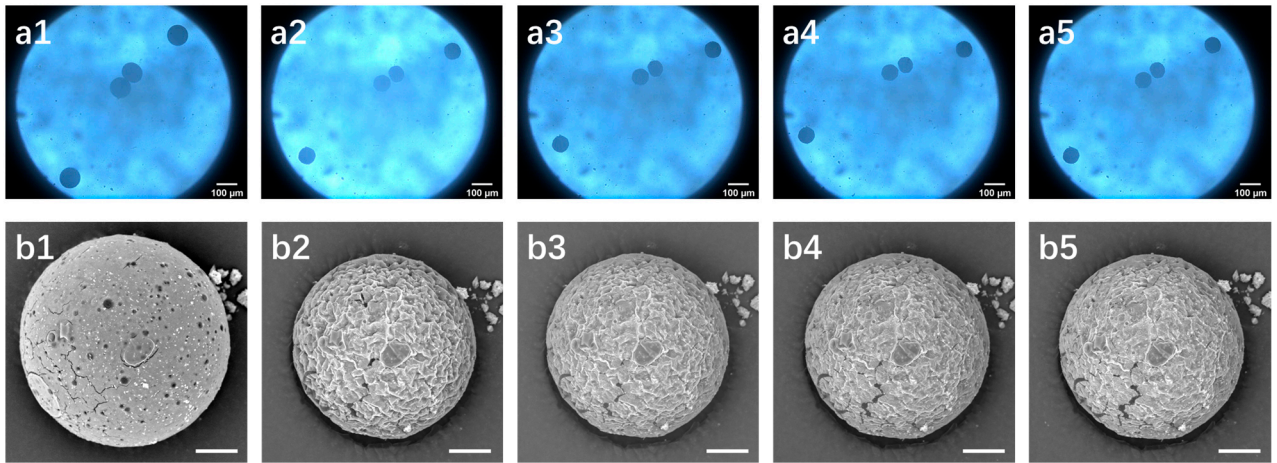

**Figure S3.** (a1–a5) Optical microscopic images (in air) and (b1–b5) SEM images of the same Na-Alg/Fe<sub>3</sub>O<sub>4</sub> microparticles (prepared with  $C_{i,Na-Alg}$  at 9 mg/mL for the microfluidic experiment). From a1 to a5, also from b1 to b5, the observation time is  $t_0$  (just after the preparation),  $t_0+20h$ ,  $t_0+24h$ ,  $t_0+48h$ ,  $t_0+72h$ . SEM scale bar 20 µm.

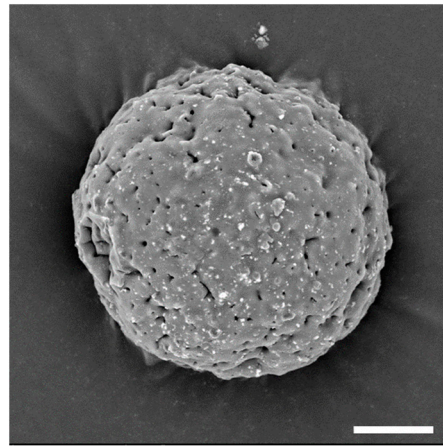

**Figure S4.** SEM image of a Na-Alg/Fe<sub>3</sub>O<sub>4</sub> microparticle stored in air for 72 h after preparation.

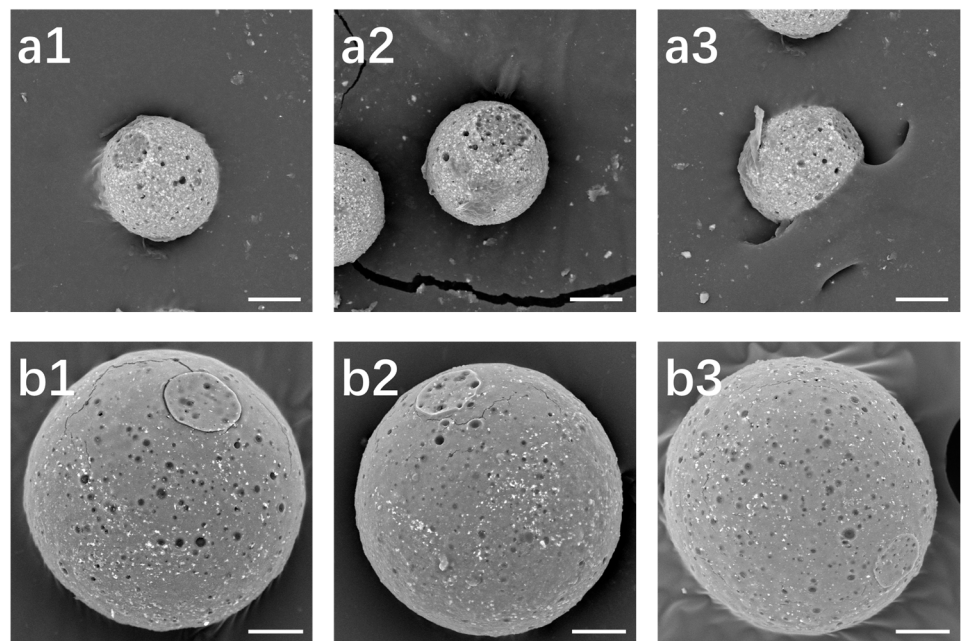

**Figure S5.** SEM images of Na-Alg/Fe<sub>3</sub>O<sub>4</sub> microparticles prepared with  $C_{i,Na-Alg}$  at (a1–a3) 0.9 mg/mL and (b1–b3) 9 mg/mL for the microfluidic experiment. Scale bar 20 µm.
