# Supplementary material for: Droplet-Based Microfluidic Preparation of Shape-Variable Alginate Hydrogel Magnetic Micromotors
Source: Nanomaterials (Basel). 2021 Dec 30;12(1):115. doi: 10.3390/nano12010115 (PMC8796028; doi:10.3390/nano12010115)
Supplement: Supplementary file 1 [file nanomaterials-12-00115-s001.zip]

Archive with 6 entries (6 files):
- nanomaterials-1501305-supplementary.pdf
- Video-1.avi
- Video-2.avi
- Video-3.avi
- Video-4.avi
- Video-5.avi
